# Supplementary material
Source: MDPI journal article supplement (https://www.mdpi.com/2073-4352/13/5/746)
Supplement: s1 [file s1]

# Physico-chemical characterization, DFT Modeling and biological Activities of a new Zn (II) complex containing melamine as a template

Thouraya Salah<sup>1</sup>, Nouredine Mhadhbi<sup>2</sup>, Ali Ben Ahmed<sup>3</sup>, Bisma Hamdi<sup>1</sup>, Najeh Krayem<sup>4</sup>, Mohamed Loukil<sup>1</sup>, Ahlem Guesmi<sup>5</sup>, Lotfi Khezami<sup>5</sup>, Ammar Houas<sup>6</sup>, Naoufel Ben Hamadi<sup>5</sup>, Houcine Naili<sup>2\*</sup> and Ferdinando Costantino<sup>7\*</sup>

<sup>1</sup>Laboratory of Materials Science and Environment, Faculty of Sciences of Sfax, University of Sfax, Tunisia.

<sup>2</sup>Laboratory Physico Chemistry of the Solid State, Department of Chemistry, Faculty of Sciences, University of Sfax, BP 1171, 3000 Sfax, Tunisia.

<sup>3</sup>Laboratory of Applied Physics, University of Sfax, Faculty of Sciences, Sfax, Tunisia.

<sup>4</sup>Laboratory of Biochemistry and Enzymatic Engineering of Lipases, University of Sfax, National School of Engineering of Sfax (ENIS), Tunisia.

<sup>5</sup>Chemistry Department, College of Science, IMSIU (Imam Mohammad Ibn Saud Islamic University), P.O. Box 5701, Riyadh 11432, Saudi Arabia.

<sup>6</sup>Research Laboratory of Catalysis and Materials for Environment and Processes, University of Gabes, City RiadhZerig, Gabes, 6029, Tunisia.

<sup>7</sup>Department of Chemistry Biology and Biotechnologies University of Perugia Via Elce di Sotto 8, 06123 Perugia, Italy.

\* Correspondence: Ferdinando Costantino : E-mail: [ferdinando.costantino@unipg.it](mailto:ferdinando.costantino@unipg.it)

**Table S1.** Observed and calculated bond lengths (Å) and angles (°) of [ZnCl<sub>4</sub>]<sup>2-</sup> tetrahedron.

|                        |             | WB97XD/Lan12dz |       | CAM-B3LYP/Lan12dz |       |
|------------------------|-------------|----------------|-------|-------------------|-------|
| Parameters             | Exp.        | DFT            | Δ (%) | DFT               | Δ (%) |
| <b>Bond length (Å)</b> |             |                |       |                   |       |
| Zn1-Cl5                | 2.2332 (13) | 2.31486        | 3.52  | 2.33535           | 4.37  |
| Zn1-Cl2                | 2.2716 (13) | 2.35524        | 3.55  | 2.33829           | 2.85  |
| Zn1-Cl3                | 2.2799 (13) | 2.36775        | 3.71  | 2.36991           | 3.79  |
| Zn1-Cl4                | 2.2827 (13) | 2.47959        | 7.94  | 2.41215           | 5.36  |
| <b>Bond angle (°)</b>  |             |                |       |                   |       |
| Cl2-Zn1-Cl3            | 107.12 (5)  | 99.56          | 7.05  | 102.43            | 4.37  |
| Cl2-Zn1-Cl4            | 108.73 (5)  | 102.41         | 5.81  | 106.81            | 1.79  |
| Cl3-Zn1-Cl4            | 107.41 (5)  | 102.26         | 4.79  | 106.12            | 1.20  |
| Cl5-Zn1-Cl2            | 111.29 (5)  | 119.63         | 6.97  | 115.61            | 3.73  |
| Cl5-Zn1-Cl3            | 109.81 (5)  | 107.25         | 2.33  | 107.55            | 2.05  |
| Cl5- Zn1-Cl4           | 112.27 (6)  | 121.46         | 7.56  | 117.08            | 4.10  |

**Table S2.** Observed and calculated bond length (Å) and bond angles (°) of the compound (C<sub>3</sub>H<sub>7</sub>N<sub>6</sub>)<sub>2</sub>[ZnCl<sub>4</sub>]·H<sub>2</sub>O.

|                        |           | WB97XD/Lan12dz |       | CAM-B3LYP/Lan12dz |       |
|------------------------|-----------|----------------|-------|-------------------|-------|
| Parameters             | Exp.      | DFT            | Δ (%) | DFT               | Δ (%) |
| <b>Bond length (Å)</b> |           |                |       |                   |       |
| N1-C4                  | 1.356 (5) | 1.361          | 0.36  | 1.361             | 0.36  |
| N1-C15                 | 1.357 (5) | 1.381          | 1.73  | 1.379             | 1.60  |
| N2-C10                 | 1.356 (5) | 1.360          | 0.29  | 1.357             | 0.07  |
| N2-C12                 | 1.361 (5) | 1.383          | 1.59  | 1.380             | 0.58  |
| N3-C4                  | 1.336 (6) | 1.340          | 0.29  | 1.339             | 0.22  |
| N3-C16                 | 1.338 (5) | 1.343          | 0.37  | 1.344             | 0.44  |
| N7-C12                 | 1.363 (6) | 1.377          | 1.01  | 1.355             | 0.58  |
| N7-C11                 | 1.398 (6) | 1.362          | 2.57  | 1.374             | 1.71  |
| N8-C11                 | 1.340 (5) | 1.343          | 0.22  | 1.346             | 0.44  |
| N8-C10                 | 1.340 (5) | 1.339          | 0.07  | 1.335             | 0.37  |
| N18-C12                | 1.478 (6) | 1.335          | 9.67  | 1.435             | 2.90  |
| N13-C15                | 1.362 (6) | 1.360          | 0.14  | 1.367             | 0.36  |
| N13-C16                | 1.403 (6) | 1.379          | 1.71  | 1.385             | 1.28  |
| N14-C16                | 1.487 (6) | 1.338          | 10.02 | 1.452             | 2.35  |
| N19-C15                | 1.483 (6) | 1.348          | 9.10  | 1.465             | 1.22  |
| <b>Bond angle (°)</b>  |           |                |       |                   |       |
| N1-C15-N13             | 118.1 (4) | 117.25         | 0.72  | 119.2             | 0.92  |
| N1-C15-N19             | 117.5 (4) | 117.04         | 0.39  | 117.9             | 0.34  |
| N2-C12-N7              | 117.0 (4) | 120.62         | 3.00  | 120.1             | 2.58  |

|             |           |        |       |        |      |
|-------------|-----------|--------|-------|--------|------|
| N2-C12-N18  | 117.3 (4) | 118.34 | 0.87  | 118.4  | 0.9  |
| N3-C4-N1    | 121.3 (4) | 120.69 | 0.50  | 122.2  | 0.73 |
| N3-C16-N13  | 122.3 (4) | 125.69 | 2.69  | 125.2  | 2.31 |
| N3-C16-N14  | 117.6 (4) | 120.32 | 2.26  | 116.6  | 0.85 |
| C4-N1-C15   | 121.9 (4) | 121.95 | 0.041 | 120.15 | 1.43 |
| C4-N3-C16   | 118.0 (4) | 117.20 | 0.67  | 116.20 | 1.52 |
| N5-C10-N2   | 119.2 (4) | 118.32 | 0.73  | 117.85 | 1.13 |
| N5-C10-N8   | 119.1 (4) | 120.61 | 1.25  | 117.65 | 1.21 |
| N6-C4-N1    | 119.1 (4) | 120.23 | 0.94  | 118.13 | 0.81 |
| C10-N2-C12  | 121.8 (4) | 122.46 | 0.53  | 119.52 | 1.87 |
| C11-N8-C10  | 118.0 (4) | 118.80 | 0.67  | 117.30 | 0.59 |
| C12-N7-C11  | 120.1 (4) | 118.75 | 1.12  | 117.60 | 2.08 |
| N13-C16-N14 | 120.1 (4) | 120.28 | 0.15  | 119.88 | 0.18 |
| N13-C15-N19 | 124.4 (4) | 125.61 | 0.96  | 123.20 | 0.96 |
| C15-N13-C16 | 118.3 (4) | 119.57 | 1.06  | 117.24 | 0.89 |
| N7-C11-N17  | 122.4 (4) | 122.00 | 0.32  | 121.06 | 1.09 |
| N7-C12-N18  | 125.6 (4) | 124.81 | 0.62  | 122.74 | 2.27 |
| N8-C10-N2   | 121.7 (4) | 123.52 | 1.47  | 124.12 | 1.95 |
| N8-C11-N7   | 121.3 (4) | 123.28 | 1.60  | 122.44 | 0.93 |
| N8-C11-N17  | 116.3 (4) | 117.71 | 1.19  | 117.3  | 0.85 |
| N6-C4-N3    | 119.7 (4) | 120.35 | 0.54  | 118.72 | 0.81 |

**Table S3.** Wavenumbers ( $\text{cm}^{-1}$ ) and assignments, of the observed and calculated bands, in the Infrared (FT-IR) and Raman spectra of the title compound.

| Experimental |           | Theoretical<br>WB97XD/Lanl2dz | Theoretical<br>CAM-B3LYP/Lanl2dz | Assignments                                 |
|--------------|-----------|-------------------------------|----------------------------------|---------------------------------------------|
| FT-IR        | Raman     |                               |                                  |                                             |
| 3778         | 3793      | 3696                          | 3795                             | $\nu_{\text{as}}(\text{OH})$                |
| 3689         | 3696      | 3608                          | 3730-3673                        | $\nu_{\text{as}}(\text{NH}_2)$              |
| 3601         | 3636-3521 | 3546                          | 3601-3502                        | $\nu_{\text{s}}(\text{NH}_2)$               |
| 3499         | 3491      | 3464                          | 3497                             | $\nu_{\text{s}}(\text{OH})$                 |
| 3372-3245    | 3387-3175 | 3439-3264                     | 3469-3234                        | $\nu(\text{NH})$                            |
| 1728-1677    | 1723-1717 | 1697                          | 1735-1697                        | $\nu(\text{C}=\text{N})$                    |
| 1633         | 1639      | 1621                          | 1665                             | $\delta(\text{H}_2\text{O})$                |
| 1519         | 1517      | 1551                          | 1646-1521                        | $\delta(\text{NH}_2)$                       |
| 1481-1341    | 1433-1337 | 1494                          | 1510-1349                        | $\delta(\text{C}-\text{N}-\text{C})$        |
| 1252-1024    | 1323-1027 | 1385                          | 1259-1020                        | $\delta(\text{N}-\text{C}-\text{NH}_2)$     |
| 980          | 979       | 998                           | 985                              | $\delta(\text{C}-\text{N}-\text{C})$ (ring) |
| 814          | 931       | 928                           | 863                              | $\nu(\text{NH})$                            |
| 777          | 865       | 867                           | 847                              | $\nu_{\text{as}}(\text{NCN})$               |
| 725          | 767       | 800                           | 805                              | $\nu_{\text{s}}(\text{NCN})$                |

|     |     |     |         |                                     |
|-----|-----|-----|---------|-------------------------------------|
| 688 | 680 | 673 | 715-693 | $\nu(\text{NH})$                    |
| 618 | 617 | 629 | 624-581 | $\nu(\text{NH}_2)$                  |
| -   | 563 | 574 | 578     | $\nu_{\text{as}}(\text{ZnCl}_4)$    |
| -   | 465 | 387 | 469     | $\nu_{\text{s}}(\text{ZnCl}_4)$     |
| -   | 363 | 358 | 358     | $\delta_{\text{as}}(\text{ZnCl}_4)$ |
| -   | 237 | 251 | 246     | $\delta_{\text{s}}(\text{ZnCl}_4)$  |

**Table S4.** Electric dipole moment, the polarizability, and second hyperpolarizability for  $(\text{C}_3\text{H}_7\text{N}_6)_2[\text{ZnCl}_4]\cdot\text{H}_2\text{O}$ .

| Theoretical<br>WB97XD/Lanl2dz                               |         | Theoretical<br>CAM-B3LYP/Lanl2dz |
|-------------------------------------------------------------|---------|----------------------------------|
| Dipole moment ( $D$ )                                       |         |                                  |
| $\mu_x$                                                     | 1.1274  | 0.3840                           |
| $\mu_y$                                                     | 10.4928 | -9.0788                          |
| $\mu_z$                                                     | -3.4779 | -0.5113                          |
| $\mu_{\text{tot}}$                                          | 1.1115  | 9.1013                           |
| Polarizability ( $\times 10^{-24} \text{esu}$ )             |         |                                  |
| $\alpha_{xx}$                                               | 15.4051 | 11.3598                          |
| $\alpha_{yy}$                                               | 26.7962 | 25.3044                          |
| $\alpha_{zz}$                                               | 25.2154 | 26.3131                          |
| $\alpha_{xy}$                                               | 0.3803  | 2.8974                           |
| $\alpha_{xz}$                                               | 1.6946  | 1.0269                           |
| $\alpha_{yz}$                                               | 1.8022  | 0.3272                           |
| $\alpha_{\text{tot}}$                                       | 22.4722 | 20.9924                          |
| Second hyperpolarizability ( $\times 10^{-36} \text{esu}$ ) |         |                                  |
| $\gamma_{xxxx}$                                             | 4.5794  | 5.6500                           |
| $\gamma_{yyyy}$                                             | 1.5133  | 1.5671                           |
| $\gamma_{zzzz}$                                             | 1.1362  | 0.6439                           |
| $\gamma_{xxyy}$                                             | 1.0160  | 1.1265                           |
| $\gamma_{xxzz}$                                             | 1.0404  | 1.4214                           |
| $\gamma_{yyzz}$                                             | 0.4063  | 0.4449                           |
| $\langle\gamma\rangle$                                      | 2.4308  | 2.7693                           |
